# Supplementary material for: Near-room temperature ferromagnetic insulating state in highly distorted LaCoO2.5 with CoO5 square pyramids
Source: PubMed Central journal article supplement (PMC7994406; doi:10.1038/s41467-021-22099-y), 2021-03-25
Supplement: 41467_2021_22099_MOESM1_ESM.pdf [file 41467_2021_22099_MOESM1_ESM.pdf]

*Supplementary information for*

**Near-Room Temperature Ferromagnetic Insulating State in Highly  
Distorted LaCoO<sub>2.5</sub> with CoO<sub>5</sub> Square Pyramids**

Qinghua Zhang<sup>1,2</sup>, Ang Gao<sup>1,3</sup>, Fanqi Meng<sup>1,3</sup>, Qiao Jin<sup>1,3</sup>, Shan Lin<sup>1,3</sup>, Xuefeng Wang<sup>1</sup>,  
Dongdong Xiao<sup>1</sup>, Can Wang<sup>1,3,4</sup>, Kui-juan Jin<sup>1,3,4</sup>, Dong Su<sup>1</sup>, Er-Jia Guo<sup>1,4,5\*</sup>, and Lin  
Gu<sup>1,3,4,\*</sup>

<sup>1</sup>*Beijing National Laboratory for Condensed Matter Physics, Institute of Physics,  
Chinese Academy of Sciences, Beijing 100190, China*

<sup>2</sup>*Yangtze River Delta Physics Research Center Co. Ltd., Liyang 213300, China*

<sup>3</sup>*School of Physical Sciences, University of Chinese Academy of Sciences, Beijing  
100049, China*

<sup>4</sup>*Songshan Lake Materials Laboratory, Dongguan, Guangdong 523808, China*

<sup>5</sup>*Center of Materials Science and Optoelectronics Engineering, University of Chinese  
Academy of Sciences, Beijing 100049, China*

\*E-mail: [ejguo@iphy.ac.cn](mailto:ejguo@iphy.ac.cn); [l.gu@iphy.ac.cn](mailto:l.gu@iphy.ac.cn)

## I. Microstructural characterizations and EELS analysis

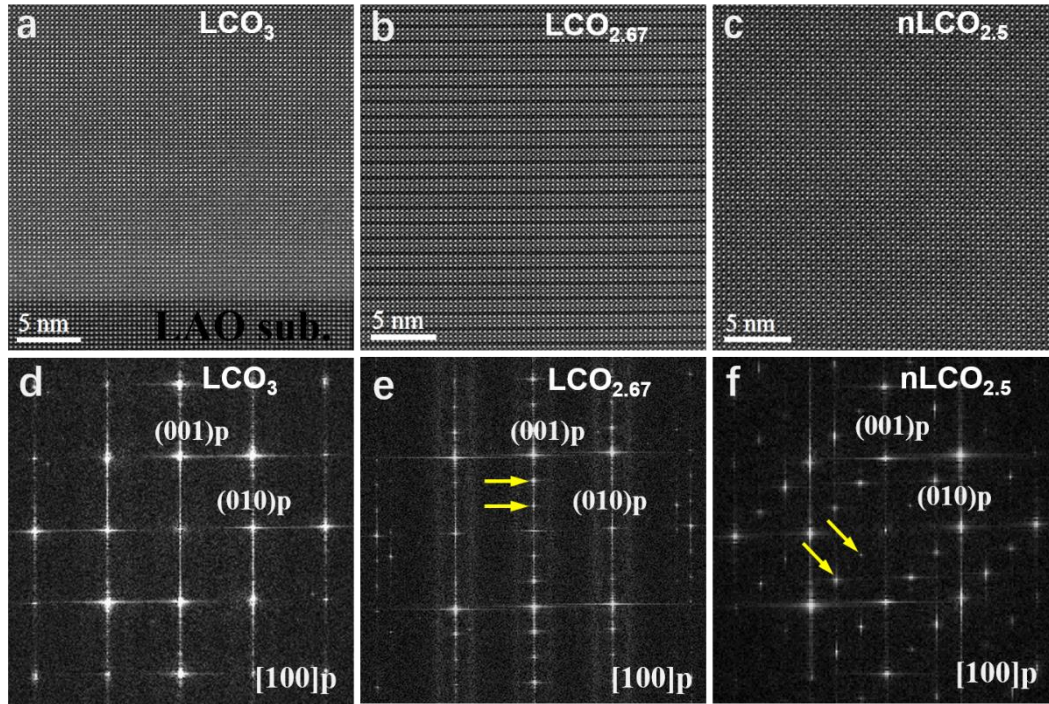

**Supplementary Fig. 1.** High-magnification high-angle angular dark-field (HAADF) images of (a) pristine LCO<sub>3</sub>, (b) LCO<sub>2.67</sub> and (c) nLCO<sub>2.5</sub> films grown on LAO substrates. The representative HAADF-STEM images were chosen randomly. For a LCO<sub>3</sub>, no vertical or horizontal dark stripes were observed. For a LCO<sub>2.67</sub>, we observed the horizontal dark stripes with a period of  $3a_0$ . For a nLCO<sub>2.5</sub>, we observed more dense dark stripes aligned 45 degrees to the surface and interface. Such structural modulation is uniform within the entire nLCO<sub>2.5</sub> sample. The corresponding FFT patterns of (d) pristine LCO<sub>3</sub>, (e) LCO<sub>2.67</sub> and (f) nLCO<sub>2.5</sub> films are in good agreement with the SAED patterns shown in Figures 1a-c.

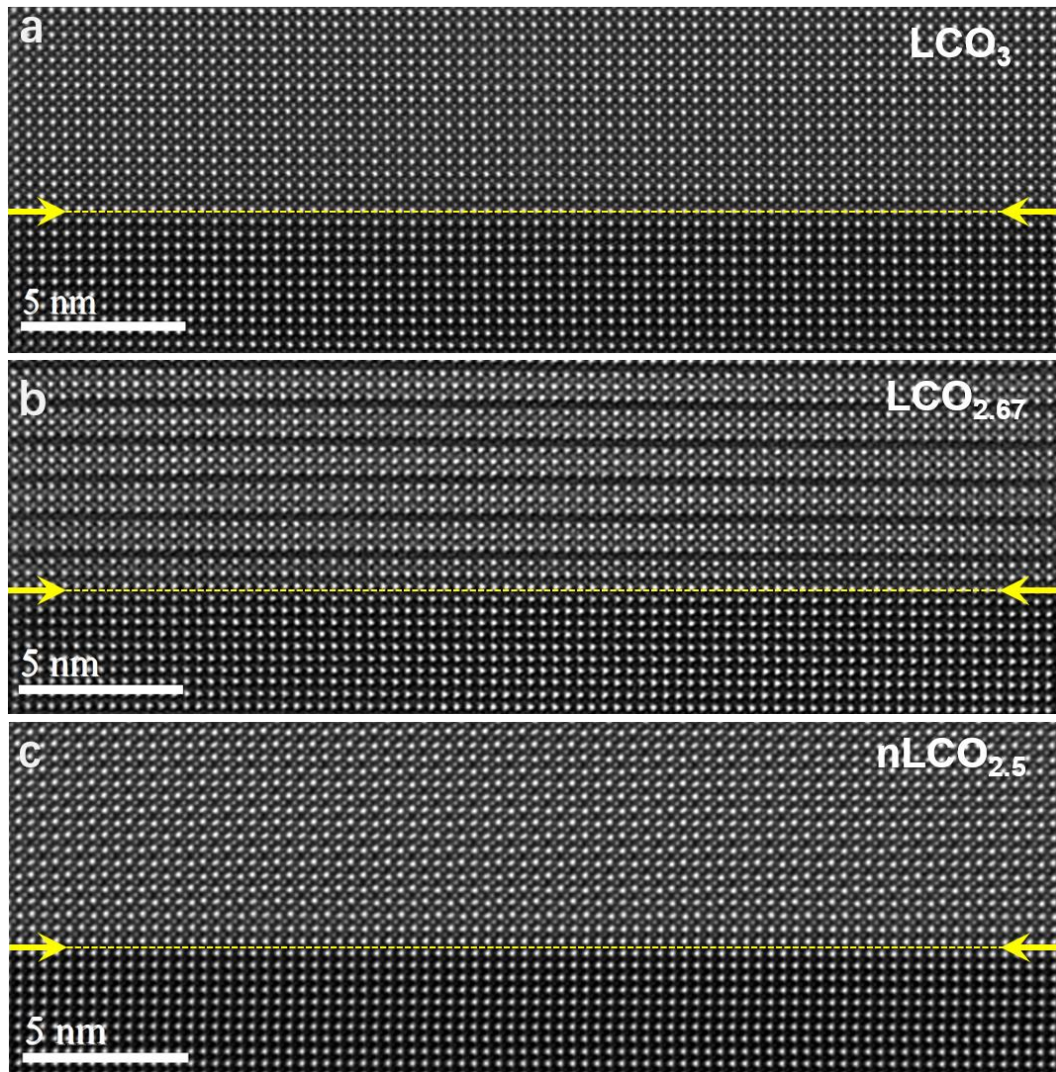

**Supplementary Fig. 2.** HAADF images of the interfaces between LaAlO<sub>3</sub> substrate and LCO<sub>3</sub> (a), LCO<sub>2.67</sub> (b) and nLCO<sub>2.5</sub> (c) films, respectively. Yellow arrows and dotted lines indicate the positions of the atomically sharp interfaces and highly coherent epitaxy of films.

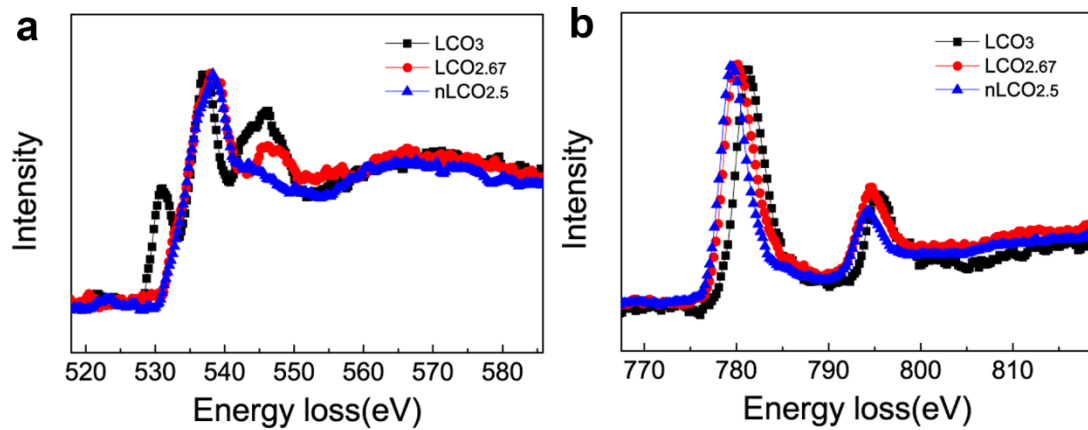

**Supplementary Fig. 3.** Comparison on the O *K*-edges (a) and Co *L*-edges (b) in three electronic states of LCO<sub>3</sub>, LCO<sub>2.67</sub>, and nLCO<sub>2.5</sub> thin films.



## II. Macroscopic structural and electronic state property characterizations

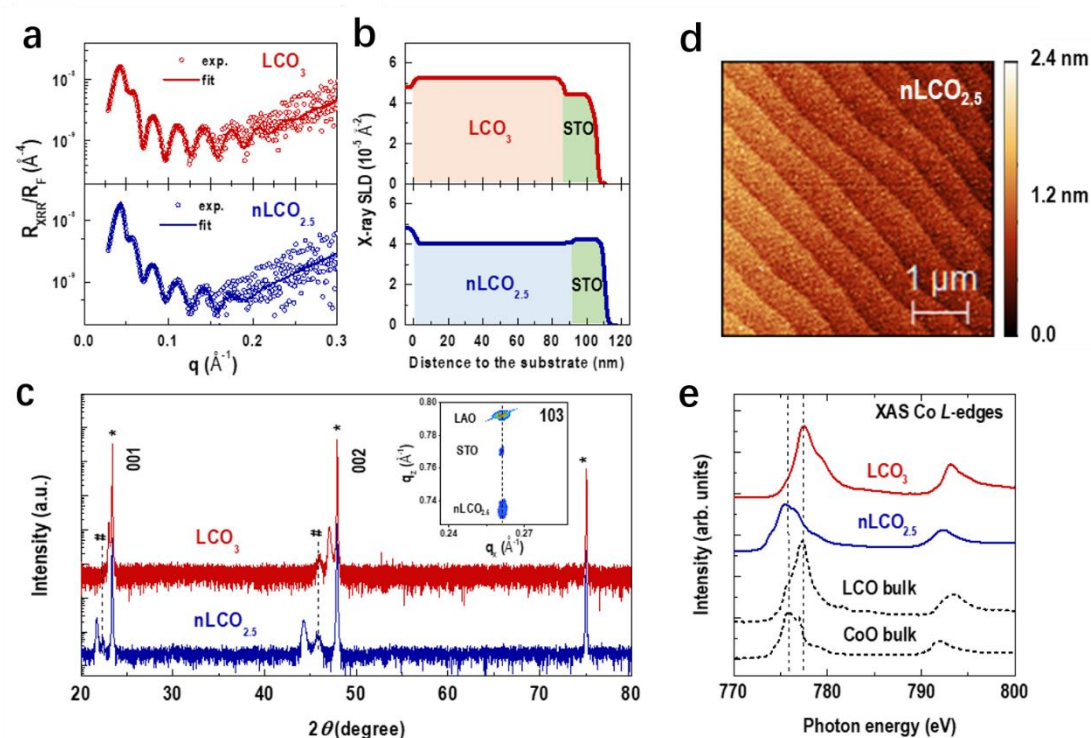

**Supplementary Fig. 4. Structure, morphology, and electronic state characterizations in LCO<sub>3</sub> and nLCO<sub>2.5</sub> thin films.** (a) X-ray reflectivities of LCO<sub>3</sub> and nLCO<sub>2.5</sub> films. The open circular symbols represent the experimental data, and the solid lines are the best fit. From XRR fittings, the chemical depth profiles [shown in (b)] of those two films can be obtained. XRR results indicate the bilayers have uniform chemical distributions, sharp interfaces, and smooth surfaces. The x-ray scattering length density (SLD), which is proportional to its chemical density, of LCO<sub>3</sub> is ~24% larger than that of nLCO<sub>2.5</sub>. In addition, the thicknesses of LCO and STO layers in the STO/LCO<sub>3</sub> bilayer are approximately 84 nm and 20 nm, respectively. While, the thickness of nLCO<sub>2.5</sub> is ~7 nm larger than that of LCO<sub>3</sub>, whereas the thickness of STO is unchanged. (c) X-ray diffraction  $\theta$ - $2\theta$  scans of LCO<sub>3</sub> and nLCO<sub>2.5</sub> films. \* indicates the 00*l* peak positions of LAO substrate. # indicates the 00*l* peak positions of STO capping layer. Both curves reveal that the LCO<sub>3</sub> and nLCO<sub>2.5</sub> films are single-phase and of high structural quality. The out-of-plane lattice constant of LCO<sub>3</sub> is 3.854 Å. After annealing in vacuum for 4 hours, the out-of-plane lattice constant of nLCO<sub>2.5</sub> films increases to 4.088 Å. The elongation of lattice constant reaches ~6.1%, in consistent

with the increment of nLCO<sub>2.5</sub> layer's thickness. In contrast, the lattice constant of STO layer keeps almost constant, indicating the vacuum-annealing, at least under the same conditions, does not create significant Vo in STO. We also performed reciprocal space mapping (RSM) on a nLCO<sub>2.5</sub> sample. Inset of (c) shows the RSM around 103 reflections around LAO substrate. Both nLCO<sub>2.5</sub> layer and STO capping layer are coherently grown on LAO substrate, suggesting the identical in-plane lattice constant. The in-plane strain can be maintained up to ~ 200 u.c. due to the rather small lattice mismatch of ~ 1% between LAO and LCO. (d) Topography of a nLCO<sub>2.5</sub> film capped with STO layer. Atomic force microscopy (AFM) image was recorded over an area of 5×5 μm<sup>2</sup> using Asylum Research AFM operated in the tapping mode. Surprisingly, we observe the step-and-terrace feature in our sample even without chemical etching the LAO substrate. The averaged r.m.s. is ~ 0.4 nm, revealing a smooth surface. The macroscopic structural and morphology measurements indicate that the as-grown LCO<sub>3</sub> films and newly formed nLCO<sub>2.5</sub> films are chemically uniform, highly crystalline, and single-phase. (e) X-ray absorption spectra (XAS) for LCO<sub>3</sub> and nLCO<sub>2.5</sub> films at Co *L*-edges. The reference spectra for Co<sup>3+</sup> (from bulk LCO) [E. J. Guo *et al.* Science Advances 5, eaav5050 (2019)] and Co<sup>2+</sup> (from bulk CoO) [N. Lu *et al.* Nature 546, 124 (2017)] are shown as black dashed lines for comparison. Apparently, XAS signal from LCO<sub>3</sub> at Co *L*-edges is nearly dominated by Co<sup>3+</sup>. The main peak left-shifts to ~ 777 eV in the XAS spectra from nLCO<sub>2.5</sub>. The line shape of XAS from nLCO<sub>2.5</sub> is almost identical to that of bulk CoO, suggesting that the Co<sup>3+</sup> ions in LCO<sub>3</sub> transit into Co<sup>2+</sup> ions in nLCO<sub>2.5</sub>.

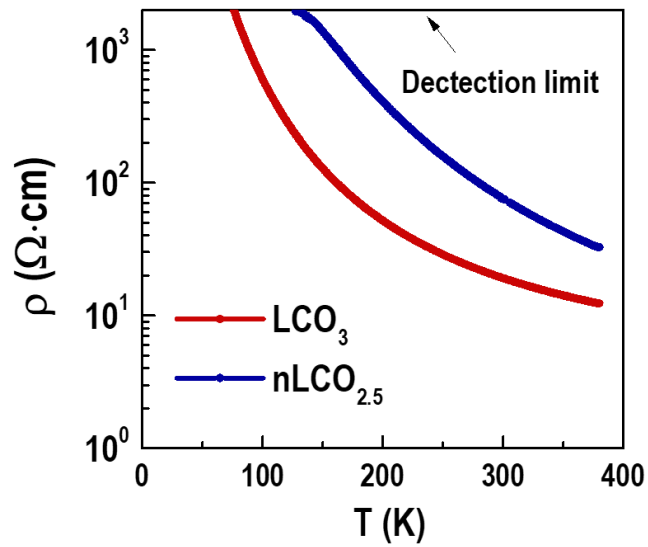

**Supplementary Fig. 5. Transport measurements on LCO<sub>3</sub> and nLCO<sub>2.5</sub> thin films.**

Resistivity ( $\rho$ ) of LCO<sub>3</sub> and nLCO<sub>2.5</sub> thin films were measured using standard van der Pauw method. The room-temperature resistivities of LCO<sub>3</sub> and nLCO<sub>2.5</sub> thin films are above 1 Megaohms, corresponding to  $\sim 1 \text{ } \Omega \cdot \text{cm}$ . The  $\rho$ - $T$  curves for LCO<sub>3</sub> and nLCO<sub>2.5</sub> thin films were measured up to 380 K. The low temperature resistivities were recorded until the detection limit of our electrical device. The negative slopes of  $\rho$ - $T$  curves indicate the insulating character of both LCO<sub>3</sub> and nLCO<sub>2.5</sub> films.

### III. Magnetic properties of $\text{LCO}_{2.67}$ films

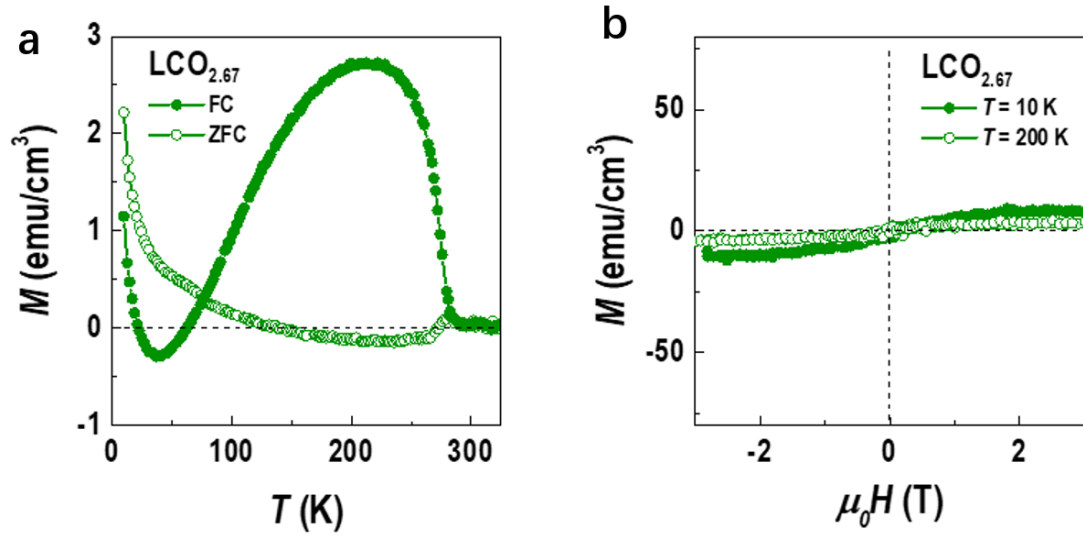

**Supplementary Fig. 6.** Magnetic properties of  $\text{LCO}_{2.67}$  films. (a)  $M$ - $T$  curves measured during the sample warming up at a magnetic field of 0.1 T. Solid and open circles represent the magnetizations were recorded after field-cooled (FC) and zero-field-cooled (ZFC), respectively. (b)  $M$ - $H$  curves recorded at 10 K and 200 K. The saturation magnetization at 10 K and 200 K is  $\sim 0.067 \mu_{\text{B}}/\text{Co}$  and  $\sim 0.02 \mu_{\text{B}}/\text{Co}$ , respectively.



#### IV. Spectrum images of O *K*- and Co *L*-edges for the line scan EELS data

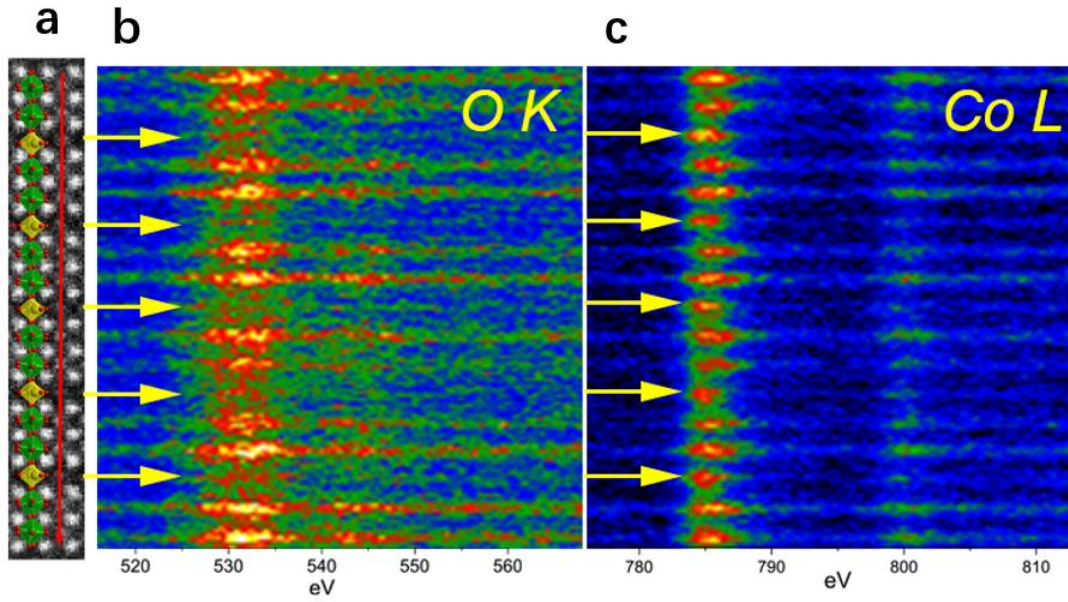

**Supplementary Fig. 7. Atomic-resolved EELS spectra of the  $\text{LCO}_{2.67}$  phase.** (a) HAADF image with overlaid  $\text{CoO}_6$  octahedra and  $\text{CoO}_4$  tetrahedra. The red line indicates the position of line scanning. Two-dimensional spectra image of (b) O *K*- and (c) Co *L*-edges, the yellow arrows indicate the oxygen-deficient  $\text{CoO}_4$  tetrahedra. The difference of O *K*- and (c) Co *L*-edges between  $\text{CoO}_6$  octahedra and  $\text{CoO}_4$  tetrahedra can be identified clearly, with periodicity of  $3a_0$ .

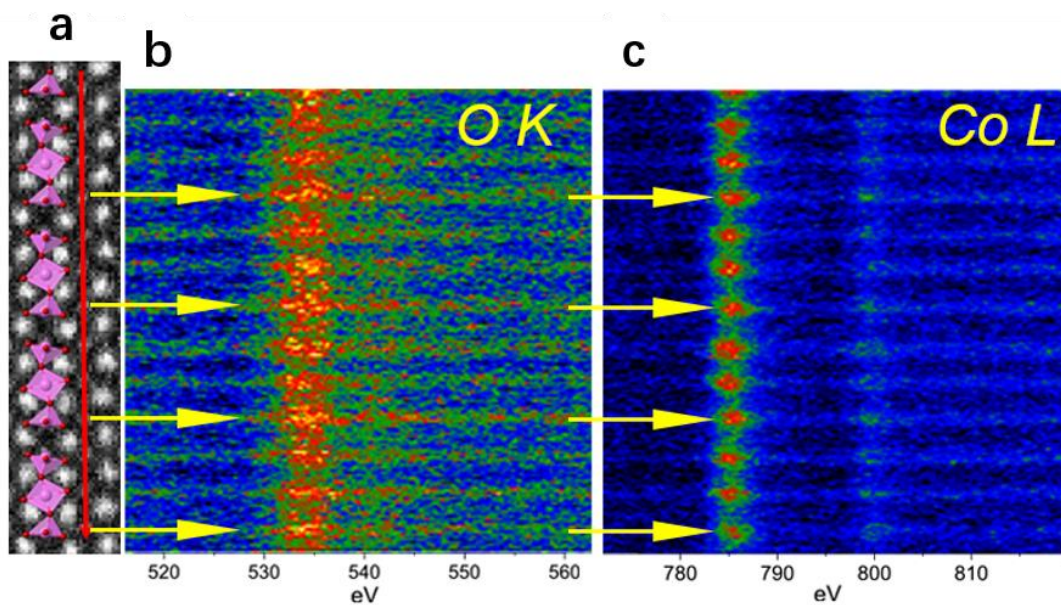

**Supplementary Fig. 8. Atomic-resolved EELS spectra of the nLCO<sub>2.5</sub> phase.** (a) HAADF image with overlaid CoO<sub>5</sub> square pyramids. The red line indicates the position of line scanning. Two-dimensional spectra image of (b) O *K*- and (c) Co *L*-edges, the yellow arrows indicate the - Co columns in Co<sub>2</sub>-O<sub>5</sub> pyramids. A roughly uniform intensity distribution of O *K*- and Co *L*-edges' signals can be visualized.

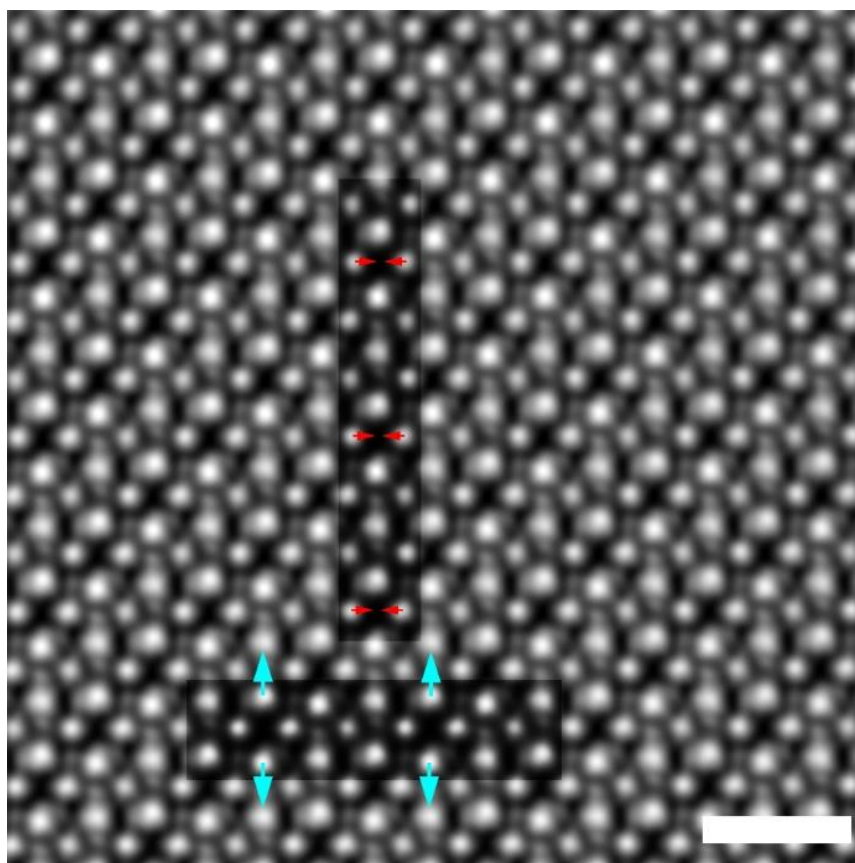

**Supplementary Fig. 9. The iDPC image of nLCO<sub>2.5</sub> phase.** Image contrast in two rectangular regions were adjusted to highlight atomic displacements of La and Co, as indicated by blue and red arrows, respectively. The scale bar is 1 nm.

## V. Structure determination and the summaries of structure parameters

With the accurate projected position of each atom, we construct two most possible structural models (nLCO-A and nLCO-B) as shown in Supplementary Fig. 9. The difference between them is relative  $V_o$  position of the  $Co_2-O_5$  square pyramids in the projected direction, where  $V_o$ s reside alternatively in  $(100)_p$  plane among neighbored  $Co_2-O_5$  square pyramids in nLCO-A and in the same  $(100)_p$  plane in nLCO-B. We optimized these two structures and find the energy of the nLCO-A is lower than that of nLCO-B, which is also favorable for the alternative arrangement of  $V_o$  in the neighbored  $Co_2-O_5$  square pyramids.

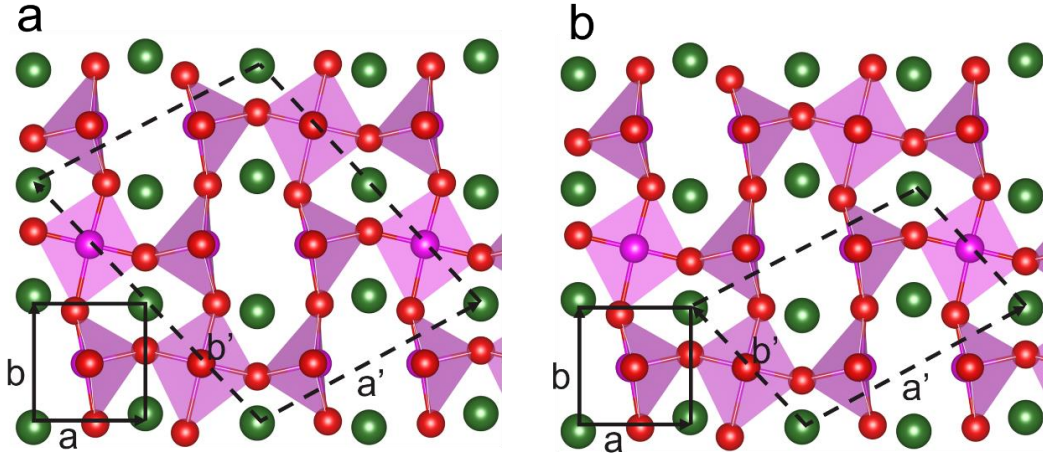

**Supplementary Fig. 10. Two possible crystal structures of nLCO<sub>2.5</sub>.**  $a$ ,  $b$  are the basic vectors of the unit cell ( $1 \times 1 \times 1$ ) and  $a'$ ,  $b'$  are the basic vectors of the extended cell ( $\sqrt{5} \times 2 \sqrt{2} \times 2$ ) for (a) nLCO-A and ( $\sqrt{5} \times \sqrt{2} \times 2$ ) for (b) nLCO-B, respectively, as indicated by dark dotted lines. The corresponding transformation matrix with the basic unit cell is  $[2, -1, 0; 2, 2, 0; 0, 0, 2]$  and  $[2, -1, 0; 1, 1, 0; 0, 0, 2]$ , respectively.

**Supplementary Table 1.**Structure parameters summary of the nLCO<sub>2.5</sub> phase from DFT calculation

| supercell                          | <i>a</i> (Å) | <i>b</i> (Å) | <i>c</i> (Å) | $\alpha$ (°) | $\beta$ (°) | $\gamma$ (°) |
|------------------------------------|--------------|--------------|--------------|--------------|-------------|--------------|
| $\sqrt{5}\times 2\sqrt{2}\times 2$ | 8.589        | 11.079       | 7.58         | 90.00        | 90.00       | 105.11       |
| 1×1×1                              | 3.79         | 4.04         | 3.79         | 90.00        | 90.00       | 90.00        |

| Atoms | label | number | <i>x</i> | <i>y</i> | <i>z</i> |
|-------|-------|--------|----------|----------|----------|
| La    | La1   | 1      | -0.007   | 0.015    | 0.000    |
| La    | La2   | 1      | 0.017    | 0.478    | 0.000    |
| La    | La3   | 1      | 0.017    | -0.022   | 0.500    |
| La    | La4   | 1      | 0.993    | 0.515    | 0.500    |
| La    | La5   | 1      | 0.687    | 0.193    | 0.000    |
| La    | La6   | 1      | 0.687    | 0.702    | 0.000    |
| La    | La7   | 1      | 0.687    | 0.202    | 0.500    |
| La    | La8   | 1      | 0.687    | 0.693    | 0.500    |
| La    | La9   | 1      | 0.323    | 0.317    | 0.000    |
| La    | La10  | 1      | 0.322    | 0.813    | 0.000    |
| La    | La11  | 1      | 0.322    | 0.313    | 0.500    |
| La    | La12  | 1      | 0.323    | 0.817    | 0.500    |
| Co    | Co1   | 1      | 0.344    | 0.084    | 0.249    |
| Co    | Co1   | 1      | 0.344    | 0.584    | 0.251    |
| Co    | Co1   | 1      | 0.344    | 0.084    | 0.751    |
| Co    | Co1   | 1      | 0.344    | 0.584    | 0.749    |
| Co    | Co1'  | 1      | 0.658    | 0.427    | 0.247    |

|    |      |   |       |       |       |
|----|------|---|-------|-------|-------|
| Co | Co1' | 1 | 0.658 | 0.927 | 0.253 |
| Co | Co1' | 1 | 0.658 | 0.427 | 0.753 |
| Co | Co1' | 1 | 0.658 | 0.927 | 0.747 |
| Co | Co2  | 1 | 0.004 | 0.247 | 0.273 |
| Co | Co2  | 1 | 0.004 | 0.747 | 0.227 |
| Co | Co2  | 1 | 0.004 | 0.247 | 0.727 |
| Co | Co2  | 1 | 0.004 | 0.747 | 0.773 |
| O  | O1   | 1 | 0.342 | 0.076 | 0.000 |
| O  | O2   | 1 | 0.342 | 0.576 | 0.000 |
| O  | O3   | 1 | 0.342 | 0.076 | 0.500 |
| O  | O4   | 1 | 0.342 | 0.576 | 0.500 |
| O  | O5   | 1 | 1.000 | 0.250 | 0.000 |
| O  | O6   | 1 | 1.000 | 0.750 | 0.500 |
| O  | O7   | 1 | 0.655 | 0.418 | 0.000 |
| O  | O8   | 1 | 0.655 | 0.918 | 0.000 |
| O  | O9   | 1 | 0.655 | 0.418 | 0.500 |
| O  | O10  | 1 | 0.655 | 0.918 | 0.500 |
| O  | O11  | 1 | 0.131 | 0.128 | 0.279 |
| O  | O12  | 1 | 0.130 | 0.628 | 0.221 |
| O  | O13  | 1 | 0.131 | 0.128 | 0.721 |
| O  | O14  | 1 | 0.130 | 0.628 | 0.779 |
| O  | O15  | 1 | 0.865 | 0.365 | 0.276 |



|   |     |   |       |       |       |
|---|-----|---|-------|-------|-------|
| O | O16 | 1 | 0.865 | 0.865 | 0.224 |
| O | O17 | 1 | 0.865 | 0.365 | 0.724 |
| O | O18 | 1 | 0.865 | 0.865 | 0.776 |
| O | O19 | 1 | 0.232 | 0.416 | 0.250 |
| O | O20 | 1 | 0.232 | 0.916 | 0.250 |
| O | O21 | 1 | 0.232 | 0.416 | 0.750 |
| O | O22 | 1 | 0.232 | 0.916 | 0.750 |
| O | O23 | 1 | 0.777 | 0.101 | 0.251 |
| O | O24 | 1 | 0.777 | 0.601 | 0.249 |
| O | O25 | 1 | 0.777 | 0.101 | 0.749 |
| O | O26 | 1 | 0.777 | 0.601 | 0.751 |
| O | O27 | 1 | 0.476 | 0.255 | 0.250 |
| O | O28 | 1 | 0.476 | 0.755 | 0.250 |
| O | O29 | 1 | 0.476 | 0.255 | 0.750 |
| O | O30 | 1 | 0.476 | 0.755 | 0.750 |

---

**Supplementary Table 2**

The Co-O bond length of CoO<sub>5</sub> square pyramids in nLCO<sub>2.5</sub> phase from DFT calculation

| bond length<br>(Å) | O1    | O2    | O3    | O4    | O5    |
|--------------------|-------|-------|-------|-------|-------|
| Co1                | 2.027 | 1.908 | 1.937 | 1.886 | 1.852 |
| Co2                | 2.072 | 1.982 | 2.189 | 1.923 | 2.340 |
| Co1'               | 2.077 | 1.878 | 1.940 | 1.917 | 2.126 |
